# Supplementary material for: Treatment Outcomes of Treatment-Naïve Hepatitis C Patients Co-Infected with HIV: A Systematic Review and Meta-Analysis of Observational Cohorts
Source: PubMed Central journal article supplement (PMC3564801; doi:10.1371/journal.pone.0055373), 2013-02-05
Supplement: pone.0055373.s001.pdf [file pone.0055373.s001.pdf]

# Systematic review

## Hepatitis C outcomes among HIV co-infected individuals in programmatic setting<sup>1</sup>

### OBJECTIVE

To determine the programmatic outcomes for the treatment of hepatitis C virus in chronically infected, treatment naïve individuals who are co-infected with HIV.

### METHODS

#### Search Strategy

- See annex

#### Databases

- MEDLINE
- EMBASE
- Bibliographies of relevant articles will be checked for further studies

#### Inclusions and exclusions

##### Types of studies

- Prospective and retrospective cohorts reporting outcomes for  $\geq 10$  patients
- All other study designs, including randomized trials, will be excluded.

##### Types of participants

###### *Inclusions:*

- Chronic HCV-infected adults co-infected with HIV who have completed treatment for HCV.

###### *Exclusions:*

- Cohorts of patients with other co-morbidities (eg HBV, haemophilia, liver transplant). Cohorts in which  $>10\%$  of patients have an additional co-morbidity will be excluded.
- Treatment-experienced cohorts. Cohorts in which  $<5\%$  of patients are treatment-experienced will be included.

##### Types of interventions

- Interferon (either pegylated or standard) with or without ribavirin.

---

<sup>1</sup> Correspondence: Nathan Ford, Médecins Sans Frontières, 67-74 Saffron Hill, London EC1N 8QX. Email: [nathan.ford@msf.org](mailto:nathan.ford@msf.org)

## **Types of outcomes**

### **Primary**

- Sustained virological response (SVR), defined as undetectable serum levels of viral RNA 24 weeks following the end of treatment

### **Secondary**

- Rapid virological response (RVR), defined as undetectable serum levels of viral RNA 24 weeks following the end of treatment
- Discontinuation of treatment due to adverse events
- Defaulting
- Mortality

## **DATA ANALYSIS**

Point estimates and 95% confidence intervals (95% CI) will be calculated for all primary and secondary outcomes. The primary outcome of SVR will be determined in an 'intent-to-treat' like analysis, with all patients initiating HCV therapy contributing to the denominator. Proportions will be root-transformed, and estimates pooled by random effects meta-analysis.

### **Heterogeneity**

The potential influence of clinical and programmatic covariates was explored through univariate subgroup analyses to assess the potential influence of:

- Genotype
- Type of HCV treatment
- Co-treatment with antiretroviral therapy
- Baseline liver damage

A P-value  $\leq 0.05$  considered as significant.

### **Statistical software**

All analyses were conducted in Stata version 12

Annex: Search strategy

|     |                                          |
|-----|------------------------------------------|
| #22 | #13 AND #18 AND #21                      |
| #21 | #19 or #20                               |
| #20 | SVR                                      |
| #19 | Sustained virological response           |
| #18 | #14 OR #15 OR #16 OR #17                 |
| #17 | Intervention                             |
| #16 | Therap*                                  |
| #15 | Treat*                                   |
| #14 | Explode "Therapeutics"[MeSH terms]       |
| #13 | #4 AND #12                               |
| #12 | #5 OR #6 OR #7 OR #8 OR #9 OR #10 OR #11 |
| #11 | Acquired Immune Deficiency Syndrome      |
| #10 | Acquired Immunodeficiency Syndrome       |
| #9  | AIDS                                     |
| #8  | Human Immunodeficiency                   |
| #7  | HIV                                      |
| #6  | Explode "HIV Infections"[MeSH Terms]     |
| #5  | Explode "HIV"[MeSH Terms]                |
| #4  | #1 OR #2 OR #3                           |
| #3  | HCV                                      |
| #2  | Hepatitis C                              |
| #1  | Explode "Hepatitis C"[MeSH Terms]        |
